# Supplementary material
Source: PubMed Central journal article supplement (PMC3987848)
Supplement: NIHMS555729-supplement-Appendix_2.pdf [file NIHMS555729-supplement-Appendix_2.pdf]

# Expression levels of Beta-defensin in colon tissue of HIV, HCV and coinfected patients

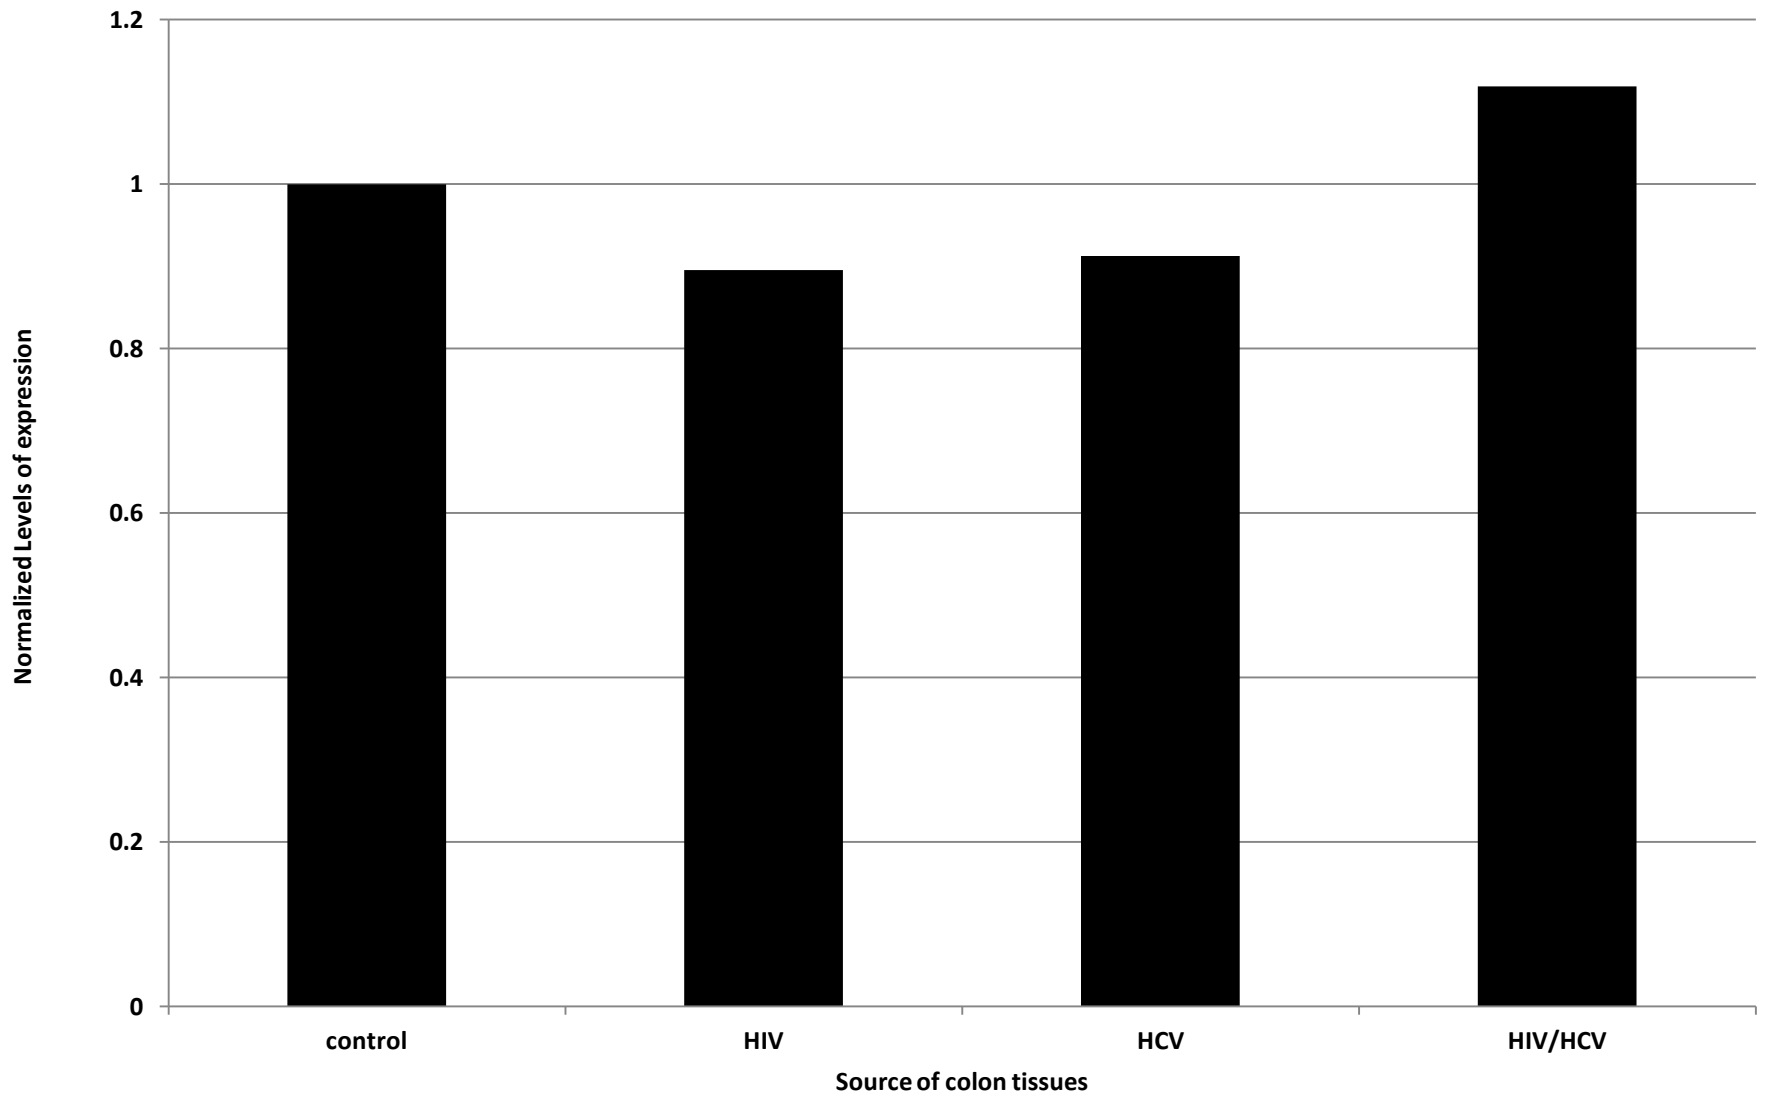

Not significant ( $p=0.95$ ) by one-way ANOVA test for expression levels of defensin (DEFB124) in the colon tissues from patients and control subjects
